# Supplementary material for: Metabolomic Analysis on the Mechanism of Nanoselenium Biofortification Improving the Siraitia grosvenorii Nutritional and Health Value
Source: MDPI journal article supplement (doi:10.3390/foods11193019), 2022-09-29
Supplement: s1 [file s1]

# **Metabolomic analysis on the mechanism of nanoselenium biofortification improving the *Siraitia grosvenorii* nutritional and health value**

**Chunran Zhou <sup>1</sup>, Jingbang Zhang<sup>1</sup>, Yangliu Wu<sup>1</sup>, Haiyan Cheng <sup>1</sup>, Qiuling Pang <sup>2</sup>, Yuanhui  
Xiao <sup>2</sup>, Dong Li <sup>3,\*</sup>  
and Canping Pan <sup>1,\*</sup>**

<sup>1</sup> Innovation Center of Pesticide Research, Department of Applied Chemistry,  
College of Science, China Agricultural University, China Yuanmingyuan  
West Road 2, Beijing 100193, China

<sup>2</sup> Guangxi Academy of Specialty Crops, Putuo Road 40, Guilin 541004, China

<sup>3</sup> Key Laboratory of Green Prevention and Control of Tropical Plant Diseases  
and Pests, Ministry of Education, College of Plant Protection, Hainan  
University, Haikou 570228, China

\* Correspondence: lidong1105@hainanu.edu.cn (D.L.);  
canpingp@cau.edu.cn (C.P.)

Total number of pages: 11

Total number of figures: 2

Total number of tables: 7

## **SUPPORTING TABLES AND FIGURES**

**Figure S1.** Effect of nano-Se on Se contents in *Siraitia grosvenorii*

**Figure S2.** Effect of nano-Se on the weight of *Siraitia grosvenorii*

**Table S1.** Parameters for mogroside V analysis by UPLC-MS/MS

**Table S2.** Parameters for flavone compounds analysis by UPLC-MS/MS

**Table S3.** Parameters for phenolic acids compounds analysis by UPLC-MS/MS

**Table S4.** Parameters for carbohydrate compounds analysis by ICS-5000<sup>+</sup>

**Table S5.** Parameters for amino acids compounds analysis by UPLC-HRMS

**Table S6.** Qualitative compounds listed by GC-IMS analysis

**Table S7.** The contents of volatile compounds treated by control and nano-Se

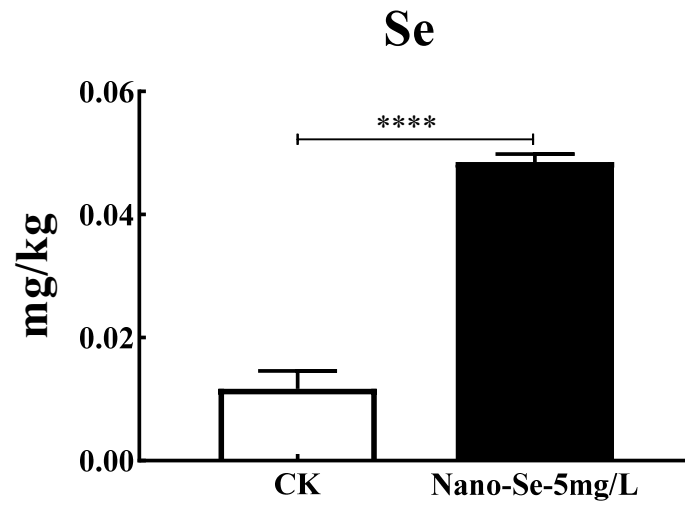

**Figure S1.** Effect of nano-Se on Se contents in *Siraitia grosvenorii*. Data are presented as mean  $\pm$  SEM (\*\*\*\*  $P < 0.0001$ . n = 3).

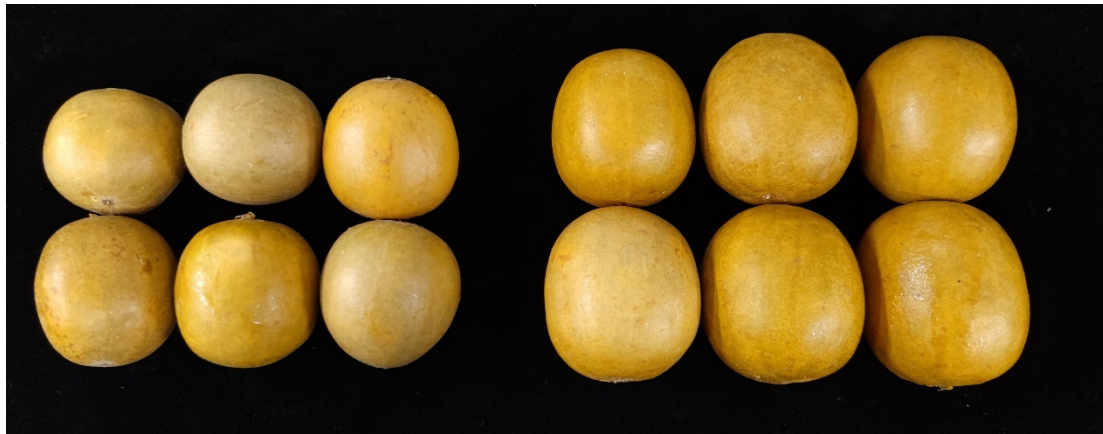

## Weight

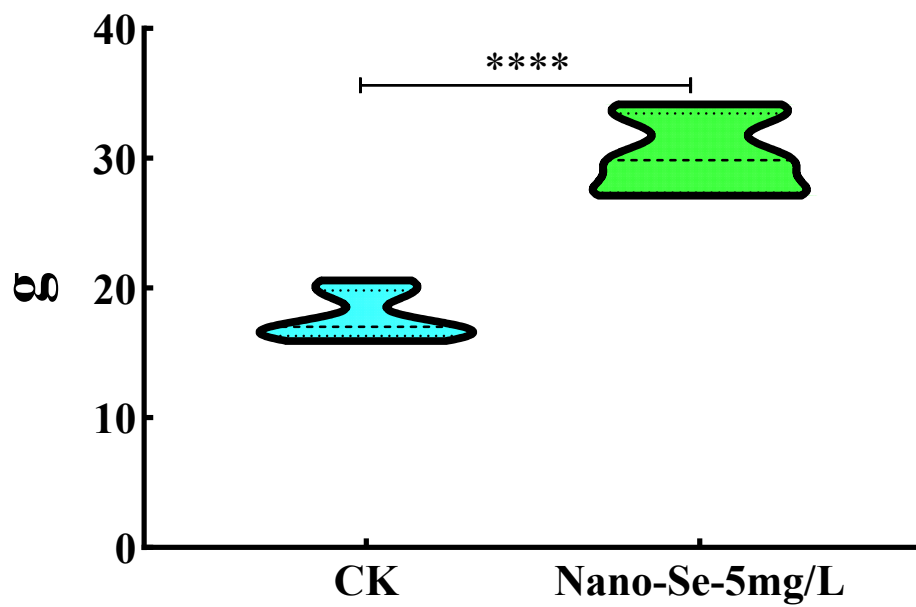

**Figure S2.** Effect of nano-Se on the weight of *Siraitia grosvenorii*. Data are presented as mean  $\pm$  SEM (\*\*\*\*  $P < 0.0001$ .  $n = 6$ ).

**Table S1.** Parameters for mogroside V analysis by UPLC-MS/MS

| Name        | Precursor/quantitative<br>transition(m/z) | Precursor/qualitative<br>transition(m/z) | Retention<br>time(min) | Collision<br>energy (CE)(V) | Polarity | Delta<br>EMV |
|-------------|-------------------------------------------|------------------------------------------|------------------------|-----------------------------|----------|--------------|
| mogroside V | 1309.5/1309.5                             | 1309.5/1309.5                            | 0.47                   | 120(5)                      | Positive | 500          |

**Table S2.** Parameters for flavone compounds analysis by LC-MS/MS

| Name       | Precursor/quantitative<br>transition (m/z) | Precursor/qualitative<br>transition (m/z) | Retention<br>time(min) | Collision energy<br>(CE)(V) | Polarity | Delta<br>EMV (-) |
|------------|--------------------------------------------|-------------------------------------------|------------------------|-----------------------------|----------|------------------|
| Apigenin   | 269/117                                    | 269/225                                   | 2.982                  | 150(40)                     | Negative | 300              |
| Luteolin   | 285/133                                    | 285/175                                   | 1.956                  | 160(35)                     | Negative | 300              |
| Quercetin  | 301/151                                    | 301/178.9                                 | 2.068                  | 140(20)                     | Negative | 300              |
| Kaempferol | 285/117                                    | 285/153                                   | 3.354                  | 155(45)                     | Negative | 300              |

**Table S3.** Parameters for phenolic acids compounds analysis by LC-MS/MS

| Name                                     | Precursor/quantitative<br>transition(m/z) | Precursor/qualitative<br>transition (m/z) | Retention<br>time(min) | Collision<br>energy (CE)(V) | Polarity | Delta<br>EMV (-) |
|------------------------------------------|-------------------------------------------|-------------------------------------------|------------------------|-----------------------------|----------|------------------|
| Ferulic Acid                             | 193/134                                   | 193/177.8                                 | 2.637                  | 90(18)                      | Negative | 300              |
| Chlorogenic acid                         | 353.1/191.1                               | 353.1/127.1                               | 3.37                   | 65(15)                      | Negative | 300              |
| Caffeic acid                             | 179/135                                   | 179/79.1                                  | 0.964                  | 160(15)                     | Negative | 300              |
| 4-Hydroxy-3,5-<br>dimethoxycinnamic acid | 223.1/208                                 | 223.1/163.8                               | 7.718                  | 90(10)                      | Negative | 300              |
| 4-Hydroxybenzoic acid                    | 137/93.1                                  | 137/65.1                                  | 8.592                  | 70(15)                      | Negative | 300              |
| Syringic acid                            | 197/182                                   | 197/167                                   | 4.279                  | 70(10)                      | Negative | 300              |

**Table S4.** Parameters for carbohydrate compounds analysis by ICS-5000<sup>+</sup>  
gradient elution program

| Time (min) | Flow (mL/min) | %A | %D  |
|------------|---------------|----|-----|
| 0          | 1             | 91 | 9   |
| 18         | 1             | 91 | 9   |
| 21         | 1             | 0  | 100 |
| 31         | 1             | 0  | 100 |
| 32         | 1             | 91 | 9   |
| 40         | 1             | 91 | 9   |

column cleaning procedure

| Time (min) | Flow (mL/min) | %A | %C | %D |
|------------|---------------|----|----|----|
| 0          | 1             | 91 | 0  | 9  |
| 4          | 1             | 91 | 0  | 9  |
| 6          | 1             | 0  | 50 | 50 |
| 30         | 1             | 0  | 50 | 50 |
| 31         | 1             | 91 | 0  | 9  |
| 40         | 1             | 91 | 0  | 9  |



**Table S5.** Parameters for amino acids compounds analysis by UPLC-HRMS

| Time (min) | Flow (mL/min) | %A | %B  |
|------------|---------------|----|-----|
| 0          | 0.3           | 97 | 3   |
| 2          | 0.3           | 88 | 12  |
| 9.5        | 0.3           | 76 | 24  |
| 10         | 0.3           | 0  | 100 |
| 12         | 0.3           | 0  | 100 |
| 12.1       | 0.3           | 97 | 3   |
| 15.5       | 0.3           | 97 | 3   |

**Table S6.** Qualitative compounds listed by GC-IMS analysis

| Count | Compound                | CAS#       | Formula                                       | MW    | RI     | Rt [sec] | Dt [RIPrel] |
|-------|-------------------------|------------|-----------------------------------------------|-------|--------|----------|-------------|
| 1     | Butyl acetate monomer   | 123-86-4   | C <sub>6</sub> H <sub>12</sub> O <sub>2</sub> | 116.2 | 803.1  | 273.777  | 1.23792     |
| 2     | Butyl acetate dimer     | 123-86-4   | C <sub>6</sub> H <sub>12</sub> O <sub>2</sub> | 116.2 | 801.4  | 271.962  | 1.61759     |
| 3     | 2-Heptanone monomer     | 110-43-0   | C <sub>7</sub> H <sub>14</sub> O              | 114.2 | 887.9  | 367.227  | 1.25989     |
| 4     | 2-Heptanone dimer       | 110-43-0   | C <sub>7</sub> H <sub>14</sub> O              | 114.2 | 888.3  | 367.681  | 1.62857     |
| 5     | hexanal monomer         | 66-25-1    | C <sub>6</sub> H <sub>12</sub> O              | 100.2 | 787.5  | 256.596  | 1.25178     |
| 6     | hexanal dimer           | 66-25-1    | C <sub>6</sub> H <sub>12</sub> O              | 100.2 | 787.3  | 256.4    | 1.56079     |
| 7     | n-Nonanal monomer       | 124-19-6   | C <sub>9</sub> H <sub>18</sub> O              | 142.2 | 1104.1 | 766.924  | 1.47358     |
| 8     | n-Nonanal dimer         | 124-19-6   | C <sub>9</sub> H <sub>18</sub> O              | 142.2 | 1103.6 | 765.852  | 1.94422     |
| 9     | ethyl hexanoate monomer | 123-66-0   | C <sub>8</sub> H <sub>16</sub> O <sub>2</sub> | 144.2 | 996.9  | 557.891  | 1.33912     |
| 10    | ethyl hexanoate dimer   | 123-66-0   | C <sub>8</sub> H <sub>16</sub> O <sub>2</sub> | 144.2 | 1000.7 | 565.395  | 1.81424     |
| 11    | (E)-2-octenal monomer   | 2548-87-0  | C <sub>8</sub> H <sub>14</sub> O              | 126.2 | 1053   | 667.231  | 1.32567     |
| 12    | (E)-2-octenal dimer     | 2548-87-0  | C <sub>8</sub> H <sub>14</sub> O              | 126.2 | 1053   | 667.231  | 1.81872     |
| 13    | Heptanal monomer        | 111-71-7   | C <sub>7</sub> H <sub>14</sub> O              | 114.2 | 910.7  | 404.782  | 1.34572     |
| 14    | Heptanal dimer          | 111-71-7   | C <sub>7</sub> H <sub>14</sub> O              | 114.2 | 906.6  | 397.485  | 1.69908     |
| 15    | 1-Pentanol monomer      | 71-41-0    | C <sub>5</sub> H <sub>12</sub> O              | 88.1  | 767.2  | 239.402  | 1.25356     |
| 16    | 1-Pentanol dimer        | 71-41-0    | C <sub>5</sub> H <sub>12</sub> O              | 88.1  | 764.4  | 237.217  | 1.50799     |
| 17    | 3-methylbutanal         | 590-86-3   | C <sub>5</sub> H <sub>10</sub> O              | 86.1  | 634.6  | 153.135  | 1.40481     |
| 18    | 2-Pentanone             | 107-87-9   | C <sub>5</sub> H <sub>10</sub> O              | 86.1  | 678.6  | 172.319  | 1.37684     |
| 19    | Pentanal                | 110-62-3   | C <sub>5</sub> H <sub>10</sub> O              | 86.1  | 694.8  | 181.677  | 1.41996     |
| 20    | Acetone                 | 67-64-1    | C <sub>3</sub> H <sub>6</sub> O               | 58.1  | 522.4  | 104.106  | 1.12135     |
| 21    | ethanol                 | 64-17-5    | C <sub>2</sub> H <sub>6</sub> O               | 46.1  | 484.8  | 87.687   | 1.04015     |
| 22    | Propanal                | 123-38-6   | C <sub>3</sub> H <sub>6</sub> O               | 58.1  | 500.9  | 94.757   | 1.05387     |
| 23    | acetic acid             | 64-19-7    | C <sub>2</sub> H <sub>4</sub> O <sub>2</sub>  | 60.1  | 599.8  | 137.909  | 1.15202     |
| 24    | Methylpropanal          | 78-84-2    | C <sub>4</sub> H <sub>8</sub> O               | 72.1  | 565.7  | 123.037  | 1.28289     |
| 25    | 2-Butanone              | 78-93-3    | C <sub>4</sub> H <sub>8</sub> O               | 72.1  | 579.1  | 128.889  | 1.24912     |
| 26    | ethyl acetate           | 141-78-6   | C <sub>4</sub> H <sub>8</sub> O <sub>2</sub>  | 88.1  | 600.9  | 138.397  | 1.33249     |
| 27    | 2-heptenal (E) monomer  | 18829-55-5 | C <sub>7</sub> H <sub>12</sub> O              | 112.2 | 956.1  | 485.394  | 1.25724     |
| 28    | 2-heptenal (E) dimer    | 18829-55-5 | C <sub>7</sub> H <sub>12</sub> O              | 112.2 | 954.2  | 482.118  | 1.66727     |
| 29    | benzaldehyde            | 100-52-7   | C <sub>7</sub> H <sub>6</sub> O               | 106.1 | 952.4  | 478.842  | 1.47828     |
| 30    | Octanal                 | 124-13-0   | C <sub>8</sub> H <sub>16</sub> O              | 128.2 | 1007   | 577.668  | 1.4091      |

**Table S7.** The contents of volatile compounds treated by control and nano-Se (\*\*\*\*  $P < 0.0001$ . n=3).

| Compound              | Peak area |          |          |          |          |          | Peak area |           |           |           |           |           | Type | Significance |
|-----------------------|-----------|----------|----------|----------|----------|----------|-----------|-----------|-----------|-----------|-----------|-----------|------|--------------|
|                       | CK-1      | CK-2     | CK-3     | CK-4     | CK-5     | CK-6     | Nano-Se-1 | Nano-Se-2 | Nano-Se-3 | Nano-Se-4 | Nano-Se-5 | Nano-Se-6 |      |              |
| 1-Pentanol dimer      | 287.43    | 282.34   | 300.91   | 305.40   | 296.25   | 305.43   | 440.50    | 443.00    | 455.02    | 469.60    | 457.11    | 451.80    | up   | ****         |
| 2-Butanone            | 1033.13   | 973.36   | 979.86   | 997.80   | 980.65   | 918.94   | 1466.26   | 1482.98   | 1537.21   | 1476.20   | 1496.07   | 1480.20   | up   | ****         |
| 2-Pentanone           | 3625.08   | 3815.92  | 3784.75  | 3806.79  | 3706.56  | 3658.02  | 5382.75   | 5353.55   | 5441.99   | 5485.59   | 5503.06   | 5517.73   | up   | ****         |
| 3-methylbutanal       | 5659.50   | 5443.11  | 5421.97  | 5487.77  | 5503.70  | 5482.16  | 6551.72   | 6474.83   | 6462.59   | 6485.78   | 6532.95   | 6542.70   | up   | ****         |
| ethanol               | 965.92    | 951.54   | 952.95   | 941.77   | 996.86   | 927.83   | 1428.04   | 1403.04   | 1358.20   | 1306.91   | 1433.27   | 1341.24   | up   | ****         |
| Heptanal dimer        | 9403.19   | 9346.44  | 9524.52  | 9444.45  | 9570.81  | 9310.74  | 10646.30  | 10677.16  | 10804.33  | 10501.57  | 10560.82  | 10571.14  | up   | ****         |
| Methylpropanal        | 1243.21   | 1229.53  | 1189.87  | 1189.81  | 1230.05  | 1159.41  | 2893.53   | 2898.17   | 2944.68   | 3019.13   | 3044.13   | 3037.38   | up   | ****         |
| n-Nonanal dimer       | 2114.77   | 2204.67  | 2181.41  | 2190.37  | 2188.64  | 2024.77  | 5194.88   | 5199.08   | 5219.93   | 5241.20   | 5170.17   | 5168.09   | up   | ****         |
| Octanal               | 1069.63   | 1043.28  | 1065.09  | 1087.55  | 1052.34  | 1067.25  | 1503.40   | 1527.34   | 1579.70   | 1546.83   | 1539.29   | 1520.81   | up   | ****         |
| Pentanal              | 2156.09   | 2163.55  | 2167.28  | 2176.74  | 2160.34  | 2147.38  | 3348.41   | 3350.59   | 3348.37   | 3230.90   | 3246.67   | 3254.14   | up   | ****         |
| Acetone               | 3810.33   | 3850.89  | 3820.48  | 3846.24  | 3654.26  | 3616.00  | 9755.51   | 9704.15   | 9856.98   | 9932.99   | 9991.17   | 10050.31  | up   | ****         |
| (E)-2-octenal dimer   | 26952.53  | 27057.00 | 27044.87 | 26683.84 | 27002.59 | 26688.85 | 20738.41  | 20786.06  | 20730.62  | 20369.05  | 20537.10  | 20501.46  | down | ****         |
| 2-heptenal ( E) dimer | 2045.61   | 1866.18  | 1780.41  | 1870.02  | 2048.87  | 1749.06  | 758.14    | 776.00    | 768.85    | 655.32    | 614.38    | 610.48    | down | ****         |
| benzaldehyde          | 1054.30   | 1153.71  | 1174.55  | 1248.32  | 1377.14  | 1200.87  | 485.98    | 517.62    | 504.31    | 468.42    | 478.91    | 440.43    | down | ****         |
| ethyl acetate         | 656.53    | 654.24   | 640.60   | 632.80   | 626.12   | 696.80   | 509.28    | 521.63    | 551.07    | 544.76    | 544.57    | 531.86    | down | ****         |
| Propanal              | 1862.45   | 1789.32  | 1692.22  | 1650.69  | 1631.88  | 1615.82  | 967.53    | 999.19    | 967.58    | 935.72    | 937.39    | 905.50    | down | ****         |
